# Supplementary material for: Genomic basis for drought resistance in European beech forests threatened by climate change
Source: eLife journal article supplement (doi:10.7554/elife.65532), 2021-06-16
Supplement: supp [file elife-65532-supp-v1.zip]

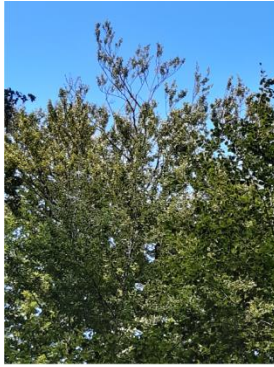

USI PF\_029

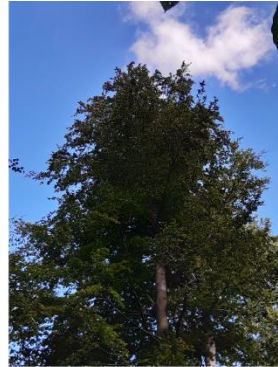

USI PF\_030

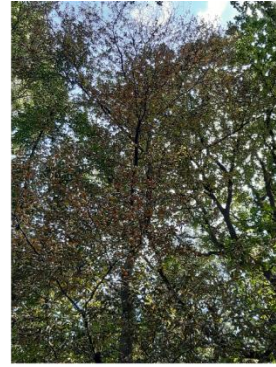

EPP PF\_039

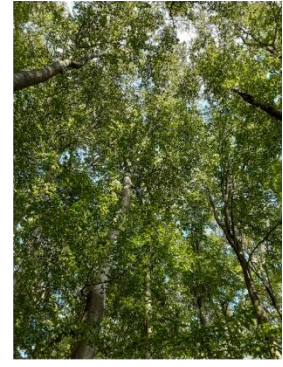

EPP PF\_040

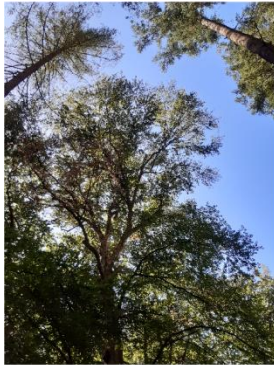

BCA PF\_050

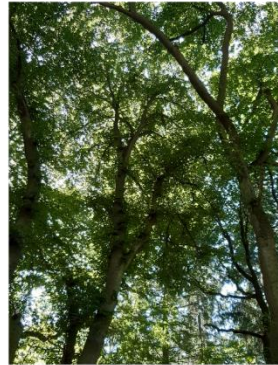

BCA PF\_051

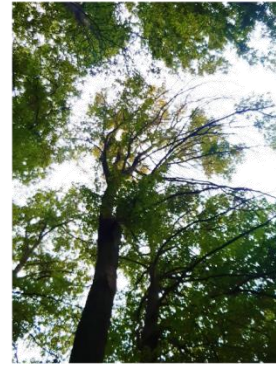

DAU PF\_054

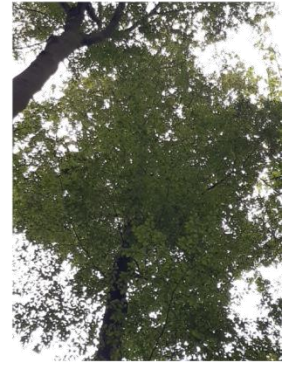

DAU PF\_055

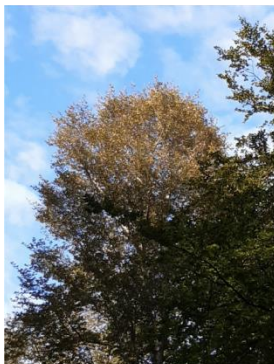

OUR PF\_068

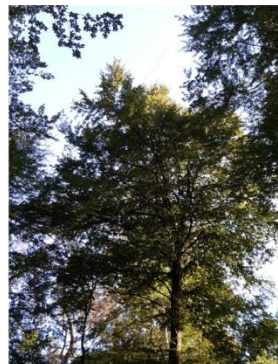

OUR PF\_069

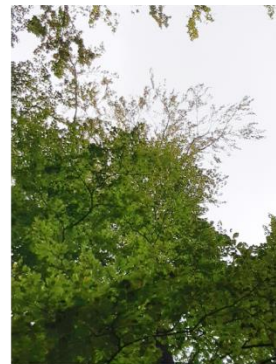

SWD PF\_060

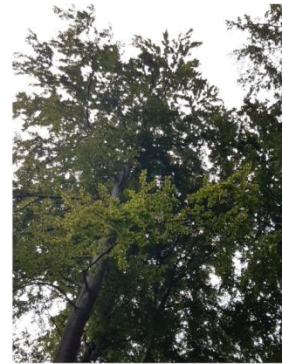

SWD PF\_061

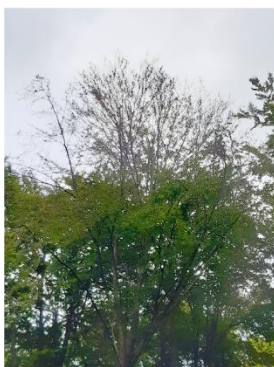

NEK PF\_070

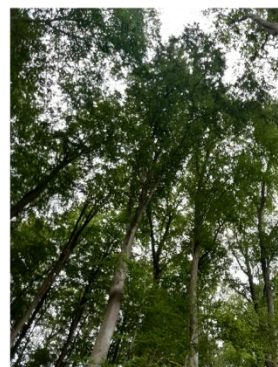

NEK PF\_071

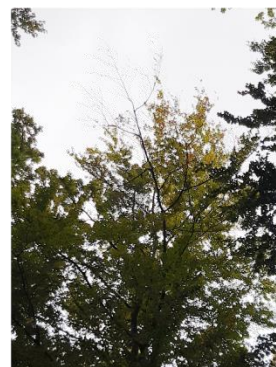

LAH PF\_076

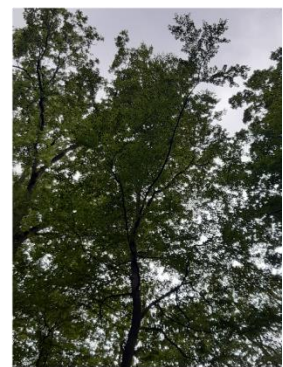

LAH PF\_077



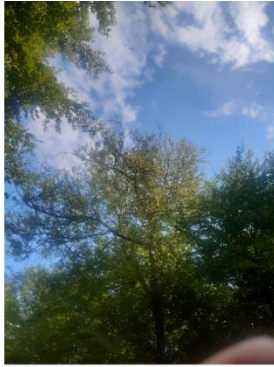

SLB PF\_095

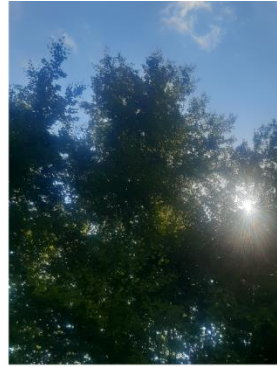

SLB PF\_096

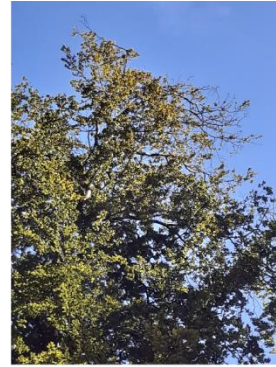

THT PF\_089

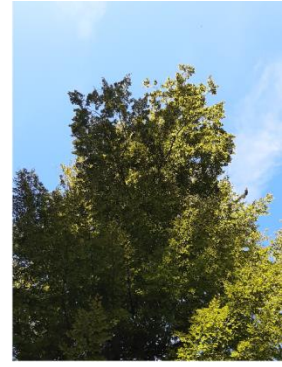

THT PF\_090

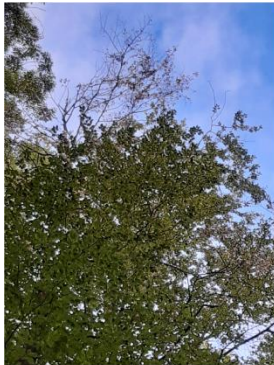

WEH PF\_110

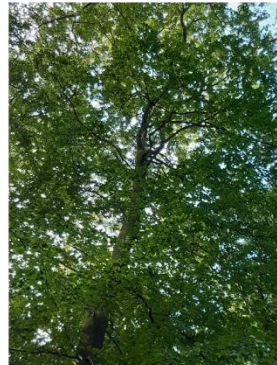

WEH PF\_111

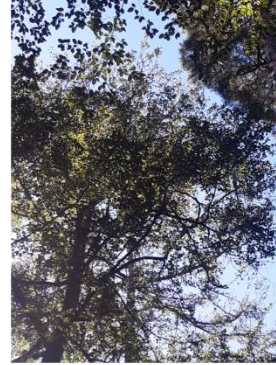

OBH PF\_019

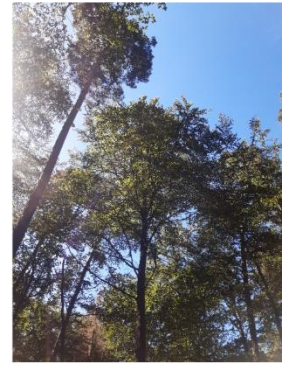

OBH PF\_020
