# Supplementary figures and images for: Genomic basis for drought resistance in European beech forests threatened by climate change
Source: eLife journal article supplement (doi:10.7554/elife.65532), 2021-06-16

A)

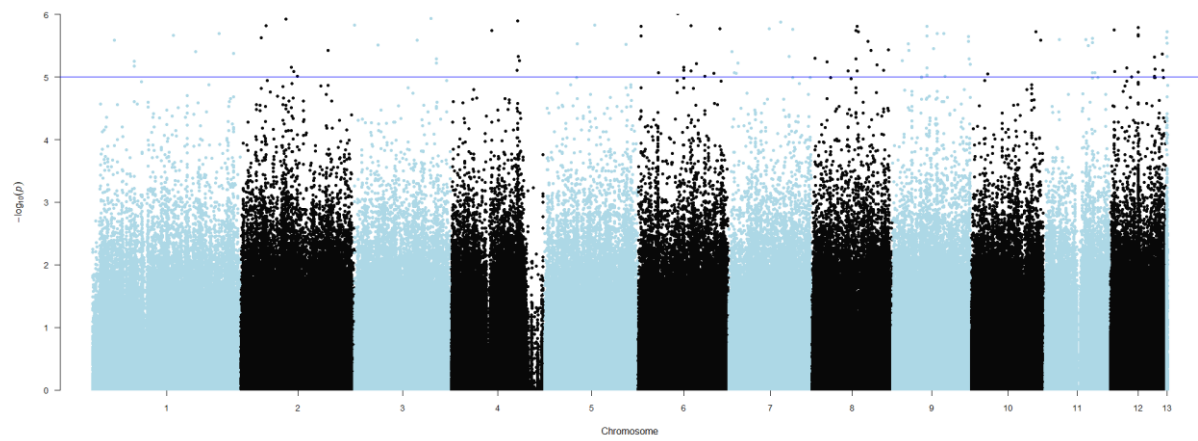

B)

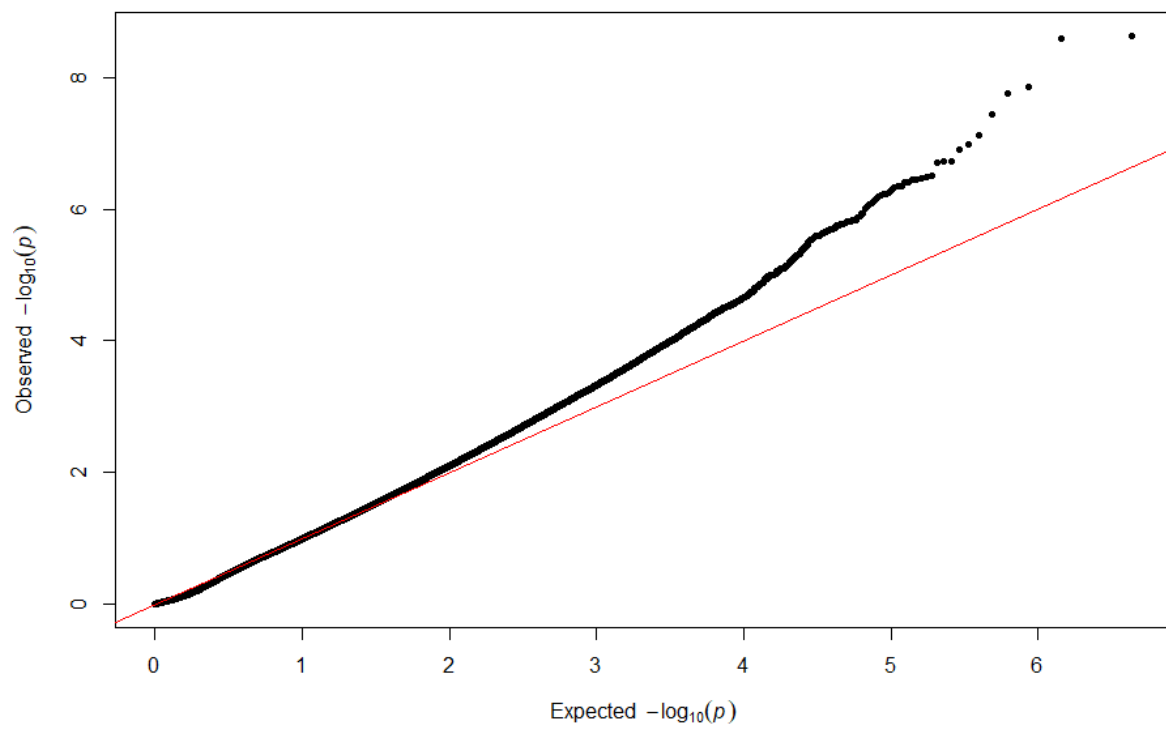

Supplement: supp [file elife-65532-supp-v1.zip]
